# Supplementary material
Source: PubMed Central journal article supplement (PMC9148702)
Supplement: NIHMS1804159-supplement-2.pdf [file NIHMS1804159-supplement-2.pdf]

## ■ ASSOCIATED CONTENT

### 📄 Supporting Information

The Supporting Information is available free of charge on the ACS Publications website at DOI: [10.1021/acs.bioconj-chem.9b00130](https://doi.org/10.1021/acs.bioconj-chem.9b00130).

Material and Methods (PDF)
